# Supplementary material for: Antioxidant Defenses Confer Resistance to High Dose Melphalan in Multiple Myeloma Cells
Source: Cancers (Basel). 2019 Mar 28;11(4):439. doi: 10.3390/cancers11040439 (PMC6521290; doi:10.3390/cancers11040439)
Supplement: Supplementary file 1 [file cancers-11-00439-s001.pdf]

# Supplementary Materials: Antioxidant Defenses Confer Resistance to High Dose Melphalan in Multiple Myeloma Cells

Claire Gourzones, Céline Bellanger, Sylvain Lamure, Ouissem Karmous Gadacha, Elvira Garcia De Paco, Laure Vincent, Guillaume Cartron, Bernard Klein and Jérôme Moreaux

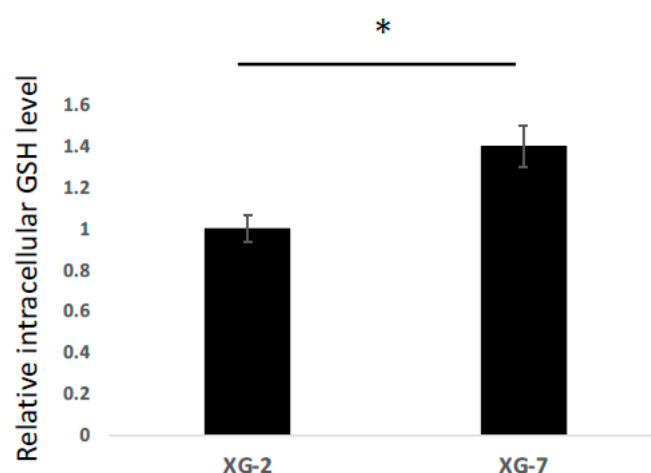

**Figure S1.** Relative intracellular GSH content in XG7 and XG2 myeloma cells. Intracellular GSH level was measured in accordance with Glutathione Assay Kit protocol (ABNOVA). Data are represented as the average  $\pm$  SD of an experiment representative of three performed in triplicate.

## XG7

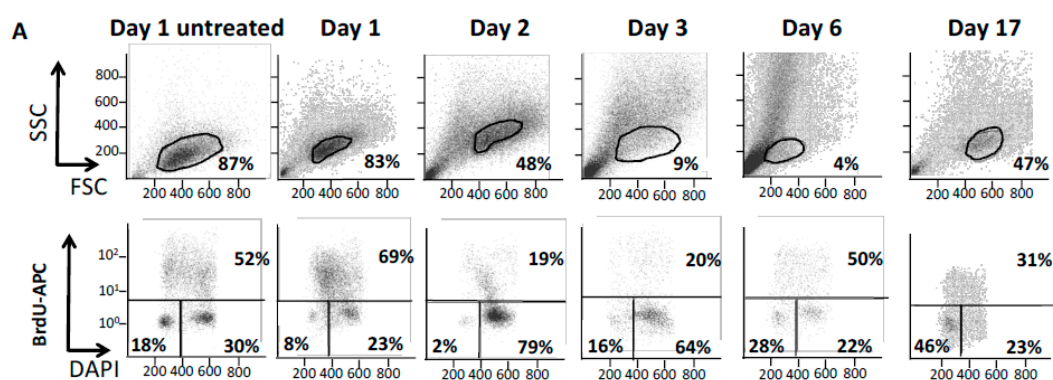

|                                     |         |         |         |         |        |           |
|-------------------------------------|---------|---------|---------|---------|--------|-----------|
| Treatment with 15 $\mu$ M melphalan | -       | +       | +       | +       | +      | +         |
| Day post-treatment                  | 1       | 1       | 2       | 3       | 6      | 17        |
| Viable cells (Cumulative count)     | 390 000 | 366 000 | 342 000 | 251 000 | 63 000 | 5 000 000 |
| % viable cells                      | 87      | 83      | 48      | 9       | 4      | 47        |
| GO-G1% total gated cells            | 18      | 8       | 2       | 16      | 28     | 46        |
| S % Total gated cells               | 52      | 69      | 19      | 20      | 50     | 31        |
| G2 % total gated cells              | 30      | 23      | 79      | 64      | 22     | 23        |

**XG2**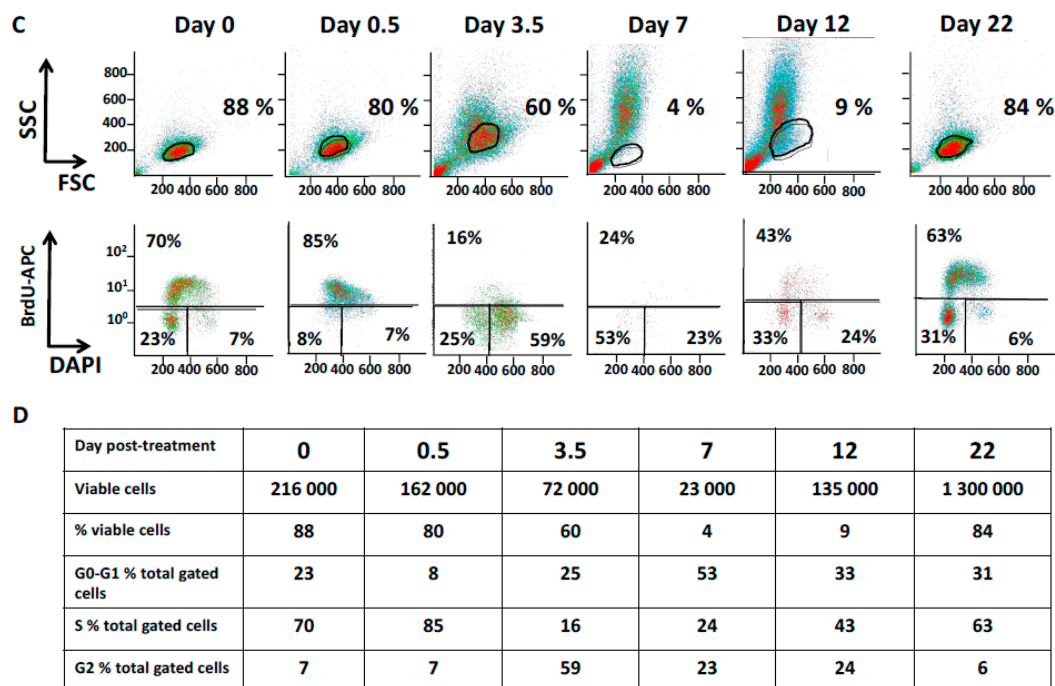

**Figure S2.** Kinetics of melphalan effect on the viability and cell cycle of XG7 and XG2 myeloma cells. **A:** XG7 cells were treated with 15  $\mu$ M melphalan (i.e., IC90) and FSC/SSC and cell cycle analyses were performed by flow cytometry after BrdU/DAPI staining before treatment (day 0) and at day 1, 2, 3, 6, 17 after the onset of treatment. **B:** The percentage of cells in each phase of the cell cycle is indicated. The percentage of viable cells was determined using FSC/SSC characteristics and cell count. **C:** XG2 cells were treated with 5  $\mu$ M melphalan (i.e., IC97) and FSC/SSC and cell cycle analysis were performed by flow cytometry after BrdU/DAPI staining before treatment (day 0) and at day 0.5, 3.5, 7, 12, 22 after the onset of treatment. **D:** The percentage of cells in each phase of the cell cycle is indicated. The percentage of viable cells was determined using FSC/SSC characteristics and cell count.

**A. XG7+melphalan**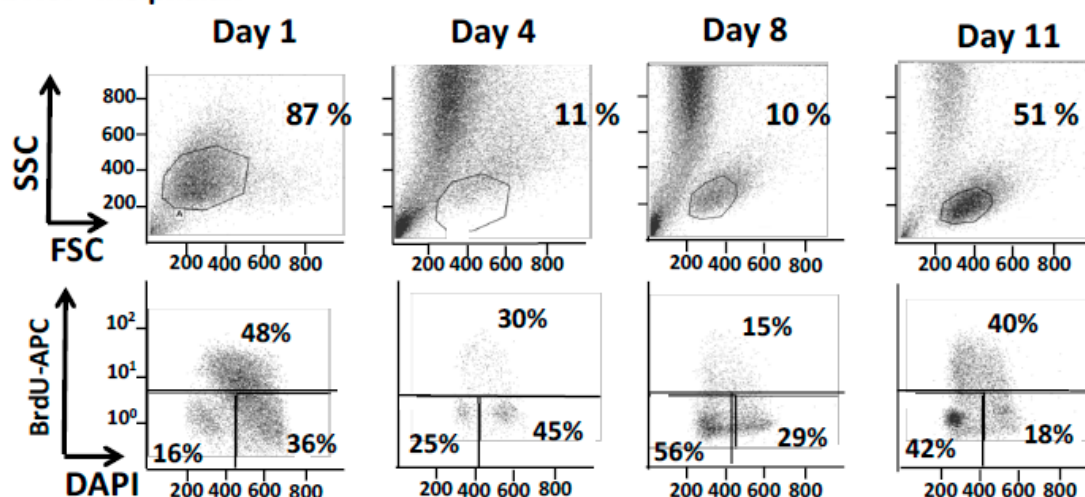**B. XG7+GSH+melphalan**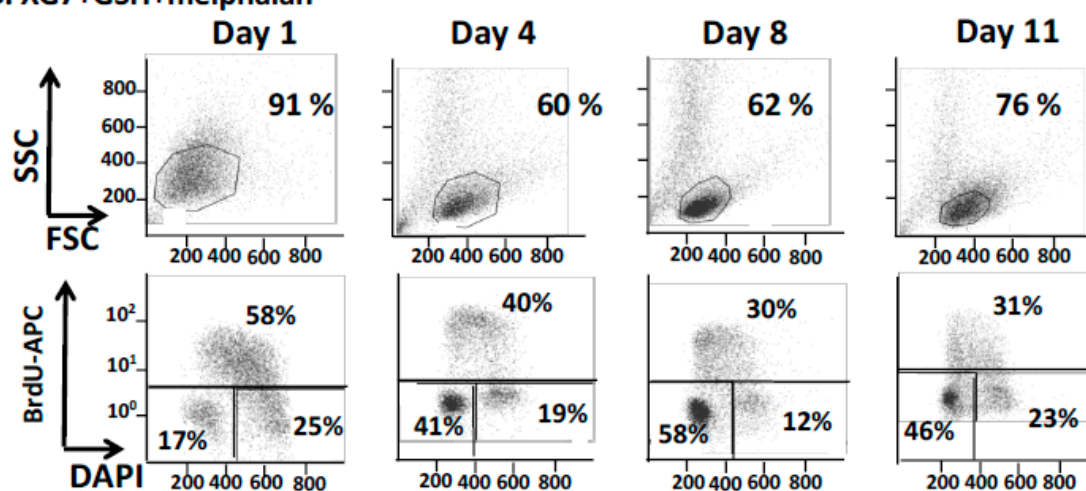

**Figure S3.** Kinetics of melphalan effect on the viability and cell cycle of XG7 myeloma cells. **(A)** XG7 cells were treated with 15  $\mu$ M melphalan and FSC/SSC and cell cycle analyses were performed by flow cytometry, using BrdU incorporation and labeling with an anti-BrdU antibody and DAPI, before treatment (day 0) and at day 1, 4, 8, 11 after the onset of treatment. **(B)** The percentage of cells in each phase of the cell cycle is indicated. The percentage of viable cells was determined using FSC/SSC characteristics and cell count.

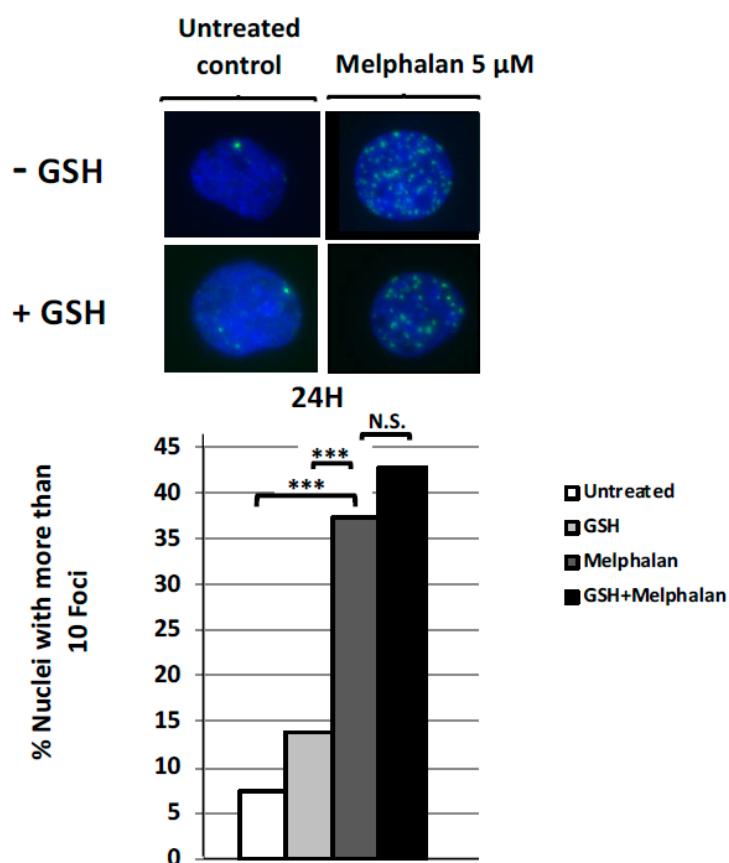

**Figure S4.** Pretreatment with GSH doesn't prevent the induction of 53BP1 foci after treatment of XG2 HMCL with melphalan. XG2 cells were treated with 5  $\mu$ M of melphalan with or without a pretreatment with 5 mM GSH. Cells were harvested after 24h and 53BP1 foci detected using immunofluorescence. A representative image for each condition and the number of foci per nuclei are shown on the figure. \*\*\*  $p < 0.001$ .

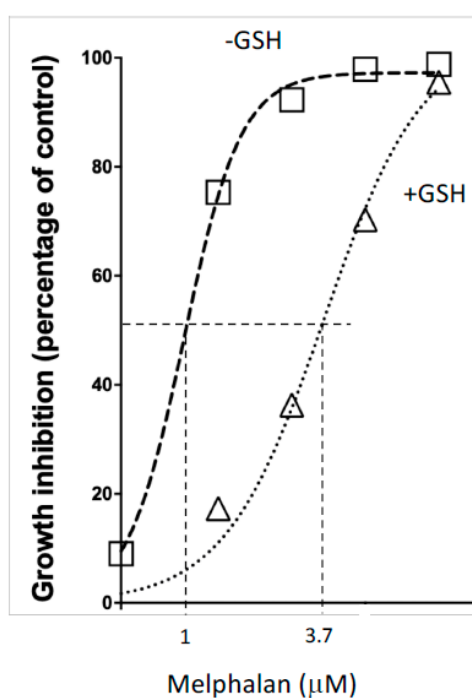

**Figure S5.** XG2 HMCL was cultured for 4 days in 96-well flat-bottom microtitre plates in RPMI 1640 medium, 10% fetal calf serum, 2 ng/ml IL-6 culture medium (control) and graded concentration of

Melphalan with or without GSH. Data are mean values of three experiments determined on sextuplet culture wells.

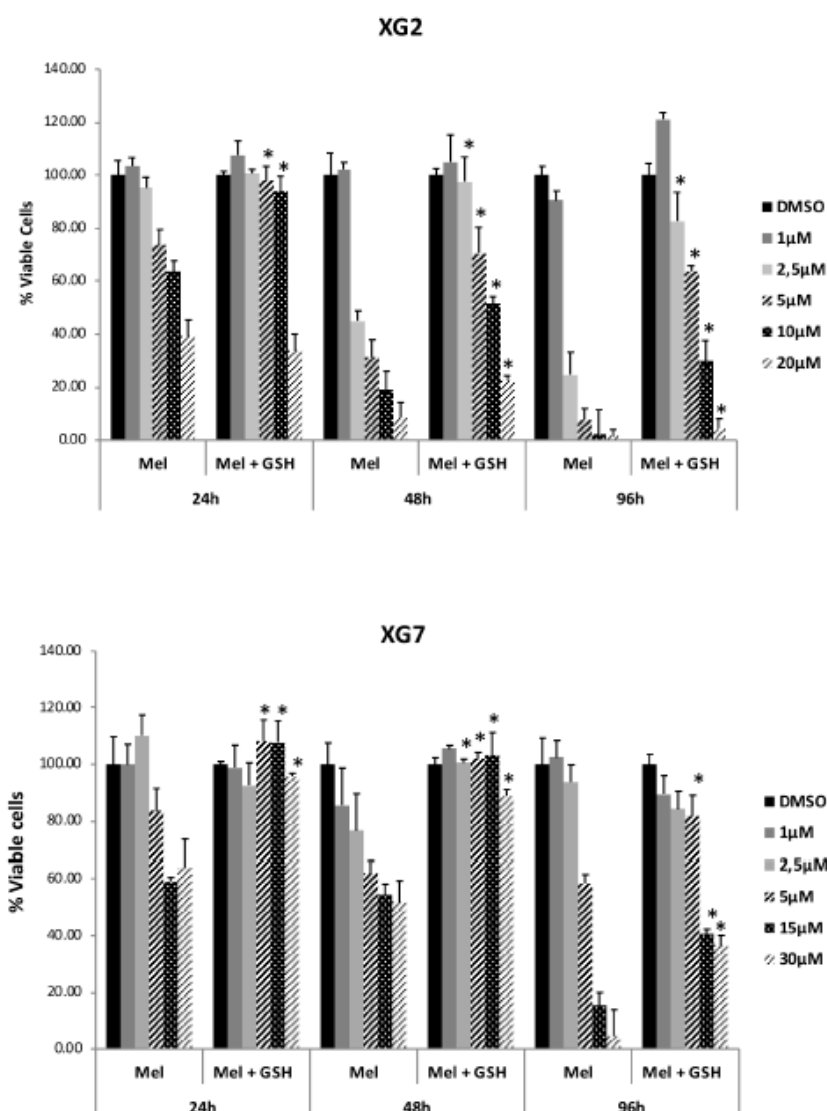

**Figure S6.** Addition of 5 mM of GSH protects MM cells from Melphalan induced toxicity. XG2 and XG7 HMCLs were cultured for 1, 2 and 4 days in 96-well flat-bottom microtitre plates in RPMI 1640 medium, 10% fetal calf serum, 2 ng/ml IL-6 culture medium (control) and graded concentration of Melphalan with or without GSH. Data are mean values  $\pm$  SD of three experiments determined on sextuplet culture wells. \*  $p < 0.05$  compared to melphalan alone.

**Table S1.** XG2 cells were treated with 5  $\mu$ M melphalan with or without cotreatment with 5 mM GSH. Four days after treatment viability was determined with trypan blue exclusion assay. Cell count and percentage of viable cells for 4 independent experiments are shown in the table.

| Treatment           | CELL COUNT $\pm$ sd | VIABILITY % $\pm$ sd |
|---------------------|---------------------|----------------------|
| Untreated           | 1 685 000 $\pm$ 574 | 739 93 $\pm$ 4       |
| GSH 5 mM            | 1 556 667 $\pm$ 592 | 687 95 $\pm$ 2       |
| Melphalan 5 $\mu$ M | 61 208 $\pm$ 18     | 244 18 $\pm$ 8       |
| GSH + Melphalan     | 476 667 $\pm$ 148   | 163 73 $\pm$ 13      |

**Table S2.** Oxidative stress response score genes.

| Probeset     | Name             | Multiple Testing<br>Corrected <i>p</i> Value | Hazard_Ratio | Prognostic |
|--------------|------------------|----------------------------------------------|--------------|------------|
| 204655_at    | CCL5             | 0.04                                         | 0.64         | Good       |
| 1553572_a_at | CYGB             | 0.02                                         | 1.6          | Bad        |
| 200862_at    | DHCR24           | 0.02                                         | 1.7          | Bad        |
| 201044_x_at  | DUSP1            | 0.02                                         | 0.58         | Good       |
| 203720_s_at  | ERCC1            | 0.01                                         | 0.58         | Good       |
| 235399_at    | ERCC2            | 0.009                                        | 0.53         | Good       |
| 236140_at    | GCLM             | 0.02                                         | 1.8          | Bad        |
| 219933_at    | GLRX2            | 0.0003                                       | 2.4          | Bad        |
| 211630_s_at  | GSS              | 0.03                                         | 0.67         | Good       |
| 203190_at    | MIR4691///NDUFS8 | 0.02                                         | 0.63         | Good       |
| 223244_s_at  | NDUFA12          | 0.01                                         | 1.7          | Bad        |
| 202001_s_at  | NDUFA6           | 0.03                                         | 1.5          | Bad        |
| 201966_at    | NDUFS2           | 0.00003                                      | 2.4          | Bad        |
| 204766_s_at  | NUDT1            | 0.03                                         | 1.9          | Bad        |
| 208690_s_at  | PDLIM1           | 0.03                                         | 1.7          | Bad        |
| 218961_s_at  | PNKP             | 0.02                                         | 0.64         | Good       |
| 211658_at    | PRDX2            | 0.03                                         | 0.65         | Good       |
| 200844_s_at  | PRDX6            | 0.009                                        | 1.7          | Bad        |
| 200845_s_at  | PRDX6            | 0.02                                         | 1.9          | Bad        |
| 215707_s_at  | PRNP             | 0.03                                         | 1.5          | Bad        |
| 230573_at    | SGK2             | 0.04                                         | 1.6          | Bad        |
| 200642_at    | SOD1             | 0.0217                                       | 1.6          | Bad        |
| 225252_at    | SRXN1            | 0.01066                                      | 1.8          | Bad        |

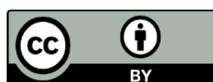

© 2019 by the authors. Licensee MDPI, Basel, Switzerland. This article is an open access article distributed under the terms and conditions of the Creative Commons Attribution (CC BY) license (<http://creativecommons.org/licenses/by/4.0/>).
